# Supplementary material for: Complexity of progranulin mechanisms of action in mesothelioma
Source: PubMed Central journal article supplement (PMC9720952; doi:10.1186/s13046-022-02546-4), 2022-12-05

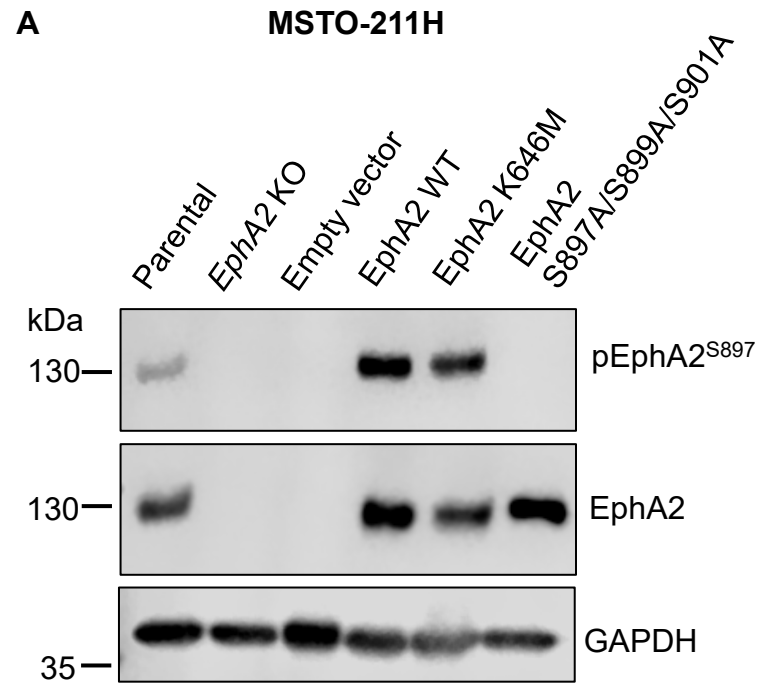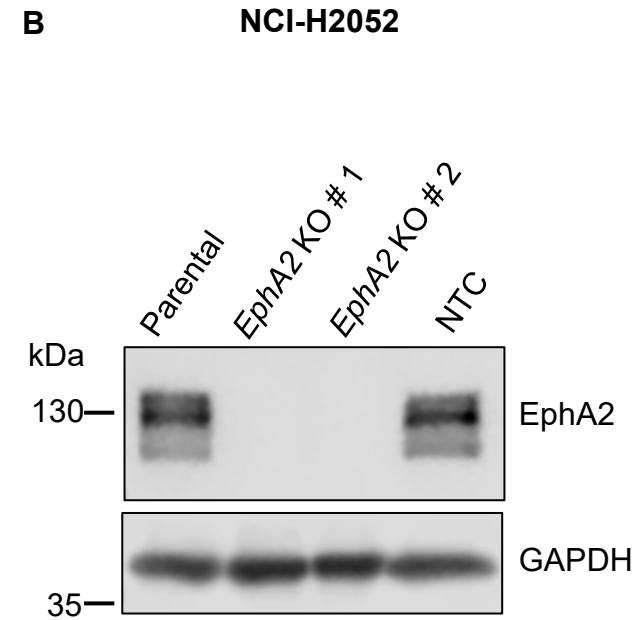

Supplement: 13046_2022_2546_MOESM1_ESM.pdf [file 13046_2022_2546_MOESM1_ESM.pdf]
