# Supplementary material for: Complexity of progranulin mechanisms of action in mesothelioma
Source: PubMed Central journal article supplement (PMC9720952; doi:10.1186/s13046-022-02546-4), 2022-12-05
Supplement: 13046_2022_2546_MOESM5_ESM.pdf [file 13046_2022_2546_MOESM5_ESM.pdf]

| <b>Primer name</b>             | <b>Primer sequence</b>                  |
|--------------------------------|-----------------------------------------|
| <i>GRN</i> fwd                 | TGGACCCTGGTGAGCTGG                      |
| <i>GRN</i> rev                 | CAGCAGCTGTCTCAAGGCTGGG                  |
| NcoI <i>GRN</i> fwd            | AATTCACCATGGCATGGACCCTGGTGAGCTGG        |
| NotI <i>GRN</i> rev            | CTCGCGGCCGCTTATCACAGCAGCTGTCTCAAGGCTGGG |
| XhoI EphA2 fwd                 | GTAACTCGAGATGGAGCTCCAGGC                |
| BamHI EphA2 rev                | GATGGGGATCCCCACAGTGTTACCTGGTCC          |
| EphA2 K646M fwd                | CCGGTGGCCATCATGACGCTGAAAGCC             |
| EphA2 K646M rev                | GGCTTTCAGCGTCATGATGGCCACCGG             |
| EphA2<br>S897A/S899A/S901A fwd | CTATCCGGCTCCCCGCCACGGCCGCGCCGAGGGGGTGCC |
| EphA2 Ser cluster rev          | GGGGAGCCGGATAGACACGCG                   |
| RYK fwd                        | CAACTCCTATCACCAGCTCCTT                  |
| RYK rev                        | TTGGCCTCCAAAAGAGTGACA                   |
| $\beta$ -actin fwd             | CAGGGCGTGATGGTGGGC                      |
| $\beta$ -actin rev             | CTCGGTCAGCAGCACGG                       |

**Supplementary Table 1. Nucleotide sequence of the primers used in the study.**
